# Supplementary material
Source: Springer Nature journal article supplement (https://www.springermedizin.de/resource/supplementary/12913_2011_2335_MOESM1_ESM.pdf/9530236)
Supplement: MOESM1 [file 9530236]

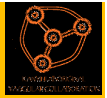

## Kanyini Health Systems Assessment Form

AMS code:

Date of interview:

Interviewers:

### Focus group members:

|  |  |
|--|--|
|  |  |
|  |  |
|  |  |

### Service characteristics

|                                                                                                                                                                                                       |                                                                                       |                                                                                       |
|-------------------------------------------------------------------------------------------------------------------------------------------------------------------------------------------------------|---------------------------------------------------------------------------------------|---------------------------------------------------------------------------------------|
| Estimated total service population:<br><br>Estimated number regular clients:<br><br>Estimated number visitors/ irregular clients:<br><br>Total budget:<br><br>% budget allocated for chronic disease: | Total staff:<br><br>GPs:<br>RNs:<br>Allied Health staff:<br>Male AHWs:<br>Female AHW: | Number Indigenous:<br><br>Number Indigenous<br>Number Indigenous<br>Number Indigenous |
|-------------------------------------------------------------------------------------------------------------------------------------------------------------------------------------------------------|---------------------------------------------------------------------------------------|---------------------------------------------------------------------------------------|

### Community ownership and accessibility- Can you describe how the health service involves the community in health care delivery?

Indigenous governing board:

Indigenous manager:

Orientation to community provided to new staff:

Client transport services available:

### Cultural safety- Can you describe how the health service approaches cultural issues in health care?

|                                                 |   |   |
|-------------------------------------------------|---|---|
| Written cultural protocols available            | Y | N |
| Cultural leave provided                         | Y | N |
| Use /support of Ngangkari/ traditional healing  | Y | N |
| Funded Ngangkari/ traditional healing services  | Y | N |
| Availability of separate male and female spaces | Y | N |

### Quality of care- Can you describe the quality improvement strategies that you have or have had in place?

|                                                  |   |   |
|--------------------------------------------------|---|---|
| Routine quality improvement activities conducted | Y | N |
| Dedicates quality Improvement staff              | Y | N |
| Chronic disease coordinator                      | Y | N |
| Clinical service orientation                     | Y | N |
| Professional development support                 | Y | N |
| Guidelines for chronic disease management:       | Y | N |
| Guideline training provided to staff             | Y | N |

**Models of care- Can you describe any systems in place to support chronic care?**

|                                     |     |                                    |     |
|-------------------------------------|-----|------------------------------------|-----|
| Outreach clinics conducted          | Y N | Computerised record system         | Y N |
| Chronic disease prevention programs | Y N | Automated pathology available      | Y N |
| Chronic disease case management     | Y N | Routine population data            | Y N |
| Onsite pharmacist                   | Y N | Recall system in place             | Y N |
| Access to Section 100               | Y N | Chronic disease register available | Y N |
| Home medicines review available     | Y N |                                    |     |
| Adherence monitoring available      | Y N |                                    |     |

**Hospital care- How adequate is the continuity of care with the hospital system?**

Hospital Liaison staff available Y N

Care planning includes hospital staff Y N

Quality of communication:

|                                   |                          |              |
|-----------------------------------|--------------------------|--------------|
| Admission notification            | <input type="checkbox"/> | (score 1-10) |
| Outpatient department/ Specialist | <input type="checkbox"/> | (score 1-10) |
| Discharge notification            | <input type="checkbox"/> | (score 1-10) |

Consistency in management between hospital and health service:  (score 1-10)

Accessibility of outpatient department/ hospital specialists:  (score 1-10)

**Regional Services- What access do you have to the following regional specialist services?**

**Cardiology Services**

Cardiologist available Y N

AMS clinics Y N How often? \_\_\_\_\_

Hospital outpatient clinics Y N How often? \_\_\_\_\_

Cardiac rehabilitation services available Y N local  regional  distant

Echocardiography service available Y N local  regional  distant

Stress tests available Y N local  regional  distant

Angiography services available Y N local  regional  distant

**Renal Services**

Nephrologist available Y N

AMS clinics Y N How often? \_\_\_\_\_

Hospital outpatient clinics Y N How often? \_\_\_\_\_

Dialysis services available Y N local  regional  distant

Transplant services available Y N local  regional  distant

**Diabetes Services based at the AMS**

Physician Y N How often? \_\_\_\_\_

Ophthalmology Y N How often? \_\_\_\_\_

Podiatry Y N How often? \_\_\_\_\_

Dietician Y N How often? \_\_\_\_\_
